# Supplementary material for: Three-Year School-Based Multicomponent Intervention May Change Fruit and Vegetable Preferences in Primary School Children—A Quasi-Randomized Trial
Source: MDPI journal article supplement (doi:10.3390/nu15163505), 2023-08-08
Supplement: s1 [file s1]

**Table S1.** Baseline characteristics of study sample. <sup>1</sup>

| Parameter                       | Total sample<br>(n = 193) | Control<br>(n =85) | Intervention<br>(n = 108) | P values <sup>2</sup> |
|---------------------------------|---------------------------|--------------------|---------------------------|-----------------------|
| Age (yr.)                       | 7.7 ± 0.4                 | 7.7 ± 0.3          | 7.7 ± 0.4                 | 0.376                 |
| Boys (%)                        | 52.3                      | 52.9               | 51.9                      | 0.880                 |
| Girls (%)                       | 47.7                      | 47.1               | 48.1                      |                       |
| Body height (cm)                | 135.3 ± 5.8               | 136.0 ± 6.3        | 134.8 ± 5.3               | 0.301                 |
| Body height-for-age z-score     | 0.9 ± 0.9                 | 0.98 ± 1.06        | 0.8 ± 0.8                 | 0.416                 |
| Body weight (kg)                | 31.4 ± 6.7                | 31.0 ± 6.1         | 31.8 ± 7.2                | 0.549                 |
| Body weight-for-age z-score     | 0.8 ± 1.1                 | 0.7 ± 1.0          | 0.9 ± 1.1                 | 0.331                 |
| Body mass index (kgm-2)         | 17.0 ± 2.7                | 16.6 ± 2.3         | 17.4 ± 2.9                | 0.069                 |
| Body mass index-for-age z-score | 0.4 ± 1.2                 | 0.7 ± 1.0          | 0.6 ± 1.2                 | 0.067                 |
| Physical activity level         | 3.1 ± 0.6                 | 3.1 ± 0.6          | 3.0 ± 0.6                 | 0.504                 |
| Sleep time (min/day)            | 586.8 ± 32.0              | 586.3 ± 33.4       | 587.2 ± 31.1              | 0.686                 |
| Screen time (min/day)           | 133.0 ± 67.2              | 129.7 ± 68.5       | 135.7 ± 66.4              | 0.352                 |

<sup>1</sup> Continuous variables are presented as mean and standard deviation and categorical as percent-age. <sup>2</sup> Differences between groups were tested using Student's t-test (p < 0.05).
