# Supplementary material for: Three-Year School-Based Multicomponent Intervention May Change Fruit and Vegetable Preferences in Primary School Children—A Quasi-Randomized Trial
Source: MDPI journal article supplement (doi:10.3390/nu15163505), 2023-08-08
Supplement: s1 [file s1]

**Table S3.** Correlation between children's preferences and characteristics at baseline (n=193).

| Parameter                                    | Fruit preference |          | Vegetable preference |          | Fruit and vegetable preferences |          |
|----------------------------------------------|------------------|----------|----------------------|----------|---------------------------------|----------|
|                                              | r coefficient    | P values | r coefficient        | P values | r coefficient                   | P values |
| Sex <sup>1</sup>                             | 0.123            | 0.087    | -0.036               | 0.616    | 0.057                           | 0.432    |
| Body mass index-for-age z-score <sup>2</sup> | -0.089           | 0.221    | -0.042               | 0.566    | -0.075                          | 0.303    |
| Physical activity level <sup>2</sup>         | 0.018            | 0.810    | -0.058               | 0.451    | -0.023                          | 0.766    |
| Sleep time (min/day) <sup>2</sup>            | -0.016           | 0.825    | -0.004               | 0.957    | -0.012                          | 0.872    |
| Screen time (min/day) <sup>2</sup>           | 0.037            | 0.618    | 0.071                | 0.341    | 0.061                           | 0.415    |

<sup>1</sup> Point-biserial correlation ( $p < 0.05$ ). <sup>2</sup> Pearson correlation ( $p < 0.05$ ).
